# Supplementary material for: Abnormal PTPN11 enhancer methylation promotes rheumatoid arthritis fibroblast-like synoviocyte aggressiveness and joint inflammation
Source: JCI journal article supplement (doi:10.1172/jci.insight.86580), 2016-05-18
Supplement: sd1 [file 1]

Correlation Between Methylation of CpGs #6 and #7  
and DEX-induced *PTPN11* Expression

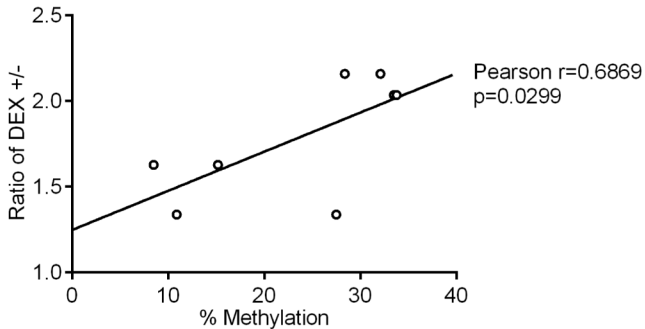

## Supplementary Figure Legends

**Supplementary Figure 1. Correlation between *PTPN11* enhancer CpG methylation in fibroblast-like synoviocytes (FLS) and dexamethasone (DEX)-induced *PTPN11* expression.**

Graph shows % methylation in FLS (n=4) of CpGs #6 and #7 within the *PTPN11* DNase I hypersensitivity region assessed by pyrosequencing versus DEX-induced *PTPN11* expression assessed by qPCR. Lines show fitting of data to a linear regression. Data were analyzed using a one-tailed Pearson correlation.
